# Supplementary material
Source: Springer Nature journal article supplement (https://www.springermedizin.de/resource/supplementary/13054_2011_9633_MOESM7_ESM.pdf/9706660)
Supplement: MOESM7 [file 9706660]

# What is your first choice solution for volume expansion?

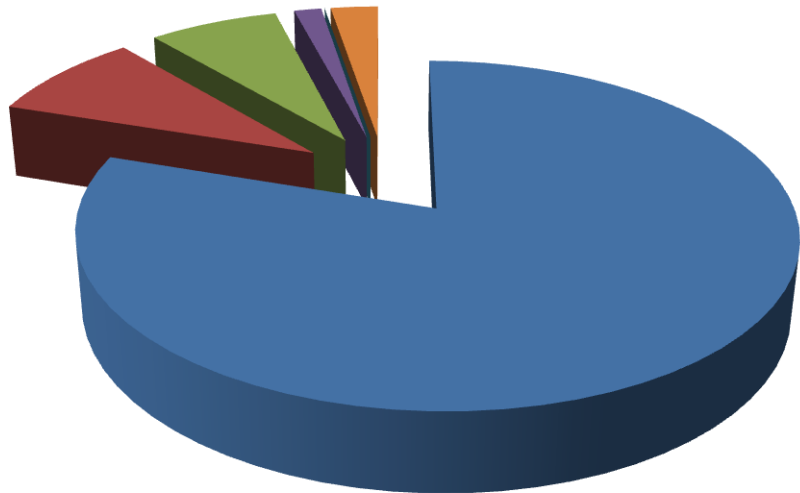

**ASA Respondents**

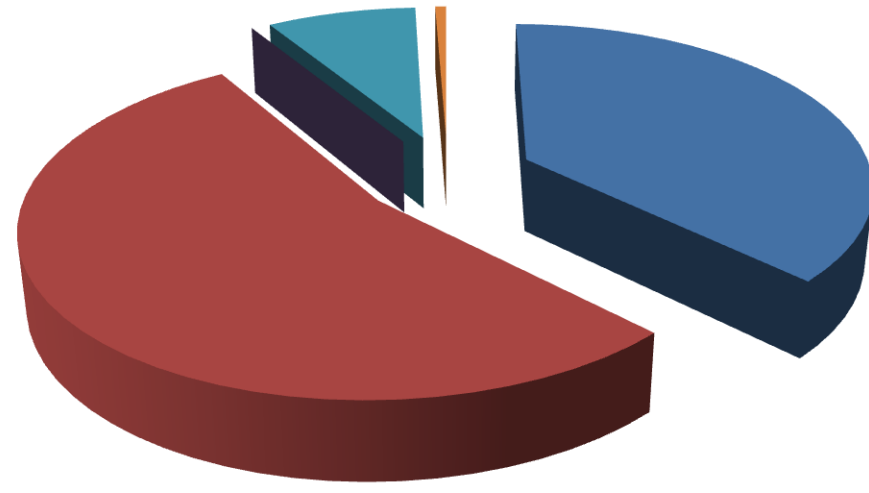

**ESA Respondents**

 **Crisalloids**

 **HES**

 **Albumin**

 **Dextrans**

 **Blood products**

 **Gelatin**
